# Supplementary material for: Ketoprofen as a photoinitiator for anionic polymerization
Source: Royal Society of Chemistry journal article supplement (doi:10.1039/c4pp00454j), 2015-04-15

Supporting Information for

## **Ketoprofen as Photoinitiator for Anionic Polymerization**

Yu-Hsuan Wang and Peter Wan

*Department of Chemistry, Box 3065, University of Victoria,*

*British Columbia, Canada, V8W 3V6*

*Fax: +1 (250) 721-7147; Tel: +1(250) 721-8976; E-mail: [pwan@uvic.ca](mailto:pwan@uvic.ca)*

### **Contents:**

- **Images of photopolymerization process in solvent-free condition** **S2**
- **NMR spectra (<sup>1</sup>H, <sup>13</sup>C) of PIs before and after photolysis and representative synthesized polymer PMA** **S3**
- **Gel Permeation Chromatography (GPC) analyses** **S17**
- **Transient absorption spectra of KP in various conditions by LFP** **S19**
- **Quenching experiments of KP with monomers MA & MMA** **S20**

**Photographic images of photopolymerization process via Method B (solvent-free condition):**

Following the photopolymerization procedure described in Method B:

(1) Left vial (marked as A157) contains a mixture of sodium salt of **1** (10 mg) and MA (3.5 mL);

(2) Right vial (marked as B157) contains a mixture of sodium salt of **4** (10 mg) and MA (3.5 mL)

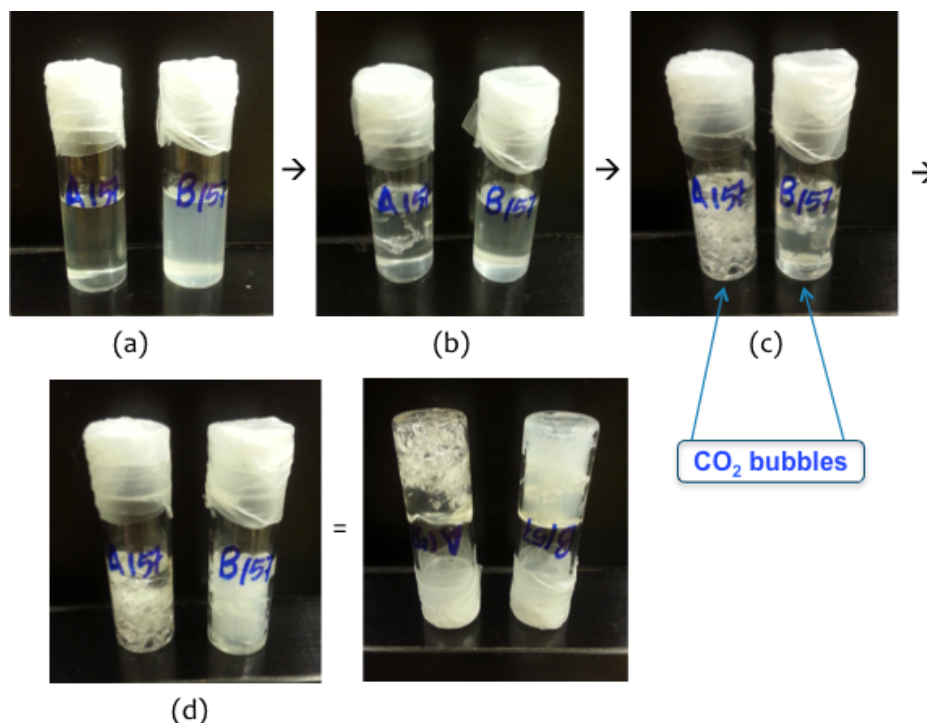

**Fig. S1** Photographic images showing formation of polymerization process *via* Method B. (a) before photolysis of sodium carboxylate salts of **1** (left vial) and **4** (right vial) in 3.5 mL of MA; after photolysis (350 nm, N<sub>2</sub>-purged) of a mixture for (b) 3 min, (c) 5 min, and (d) 10 min. A significant amount of entrapped gas bubbles (CO<sub>2</sub>) was formed accompanying with the formation of PMA, transitioning to a viscous gel into a rubbery solid. Polymers were characterized by GPC analysis (in THF, polystyrene standards):  $M_n = 16,910$  and  $M_w/M_n = 1.05$  for **1**; whereas  $M_n = 7919$  and  $M_w/M_n = 1.13$  for **4**.

<sup>1</sup>H-NMR spectra (500 MHz, CDCl<sub>3</sub>) of 7:

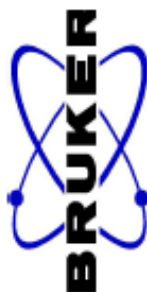

```

NAME          LW029P1
EXPNO         1
PROCNO        1
Date_         2011102
Time          16.48
INSTRUM       spect
PROBHD        5 mm F4BBI 1H/
PULPROG       zg30
TD            32768
SOLVENT       CDCl3
NS            16
DS            2
SWH           5081.301 Hz
FIDRES        0.155069 Hz
AQ            3.224519 s
RG            322.5
DQ            98.400 us
DE            6.50 us
TE            298.0 K
D1            1.00000000 s
TD0           1

===== CHANNEL f1 =====
NUC1          1H
P1            9.80 us
PL1          -1.00 dB
SFO1         500.1323756 MHz
SI           16384
SF           500.1300233 MHz
WDW           EM
SSB           0
LB           0.30 Hz
GB           0
PC           1.00
    
```

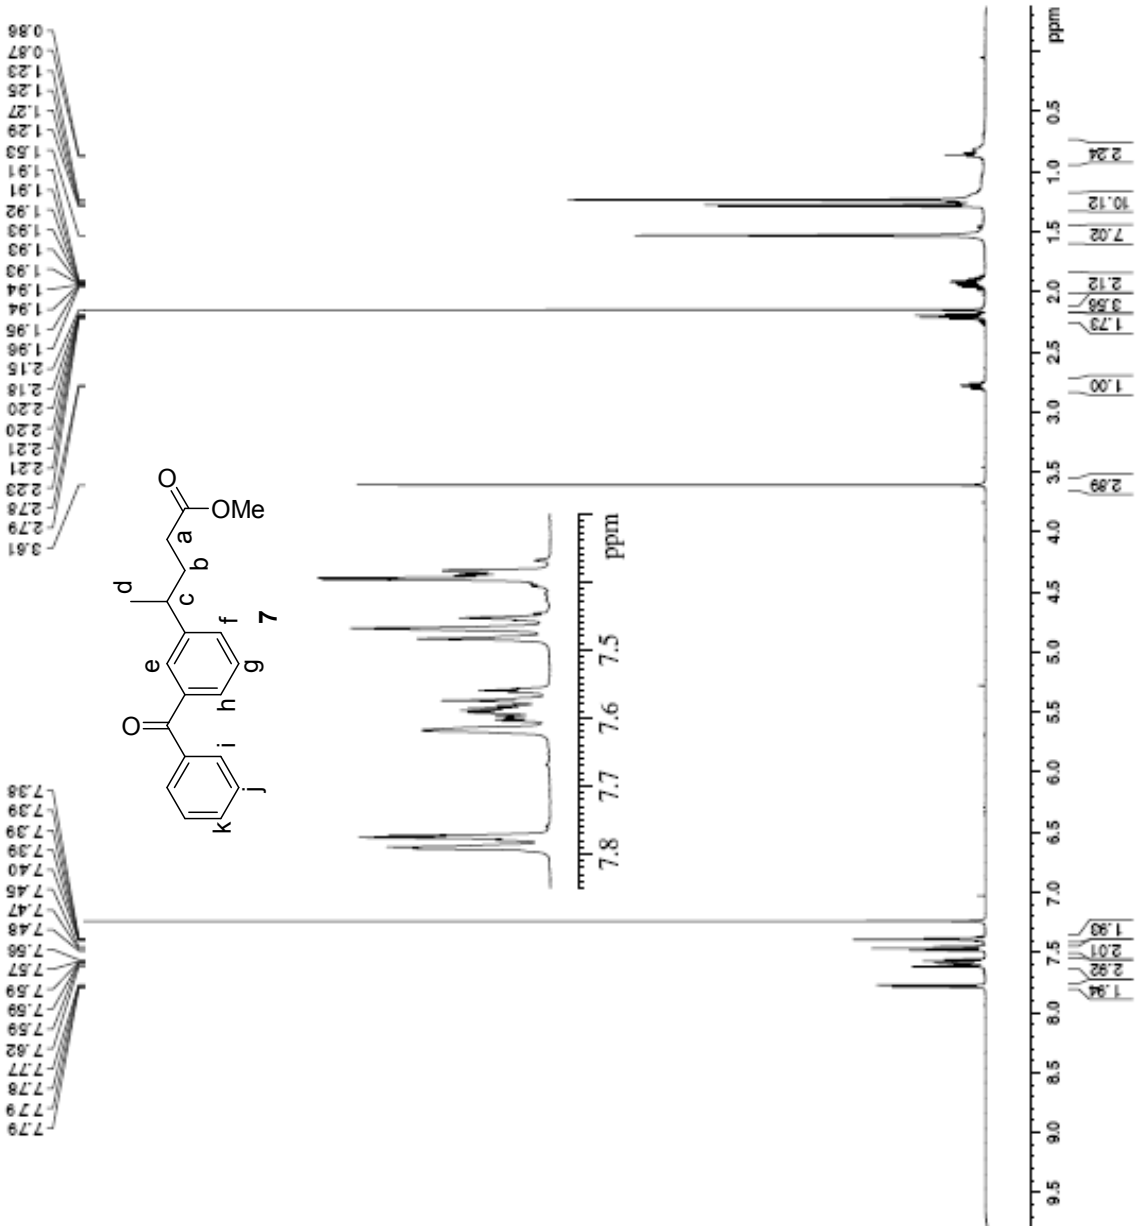

gCOSY spectrum of 7 in CDCl<sub>3</sub>:

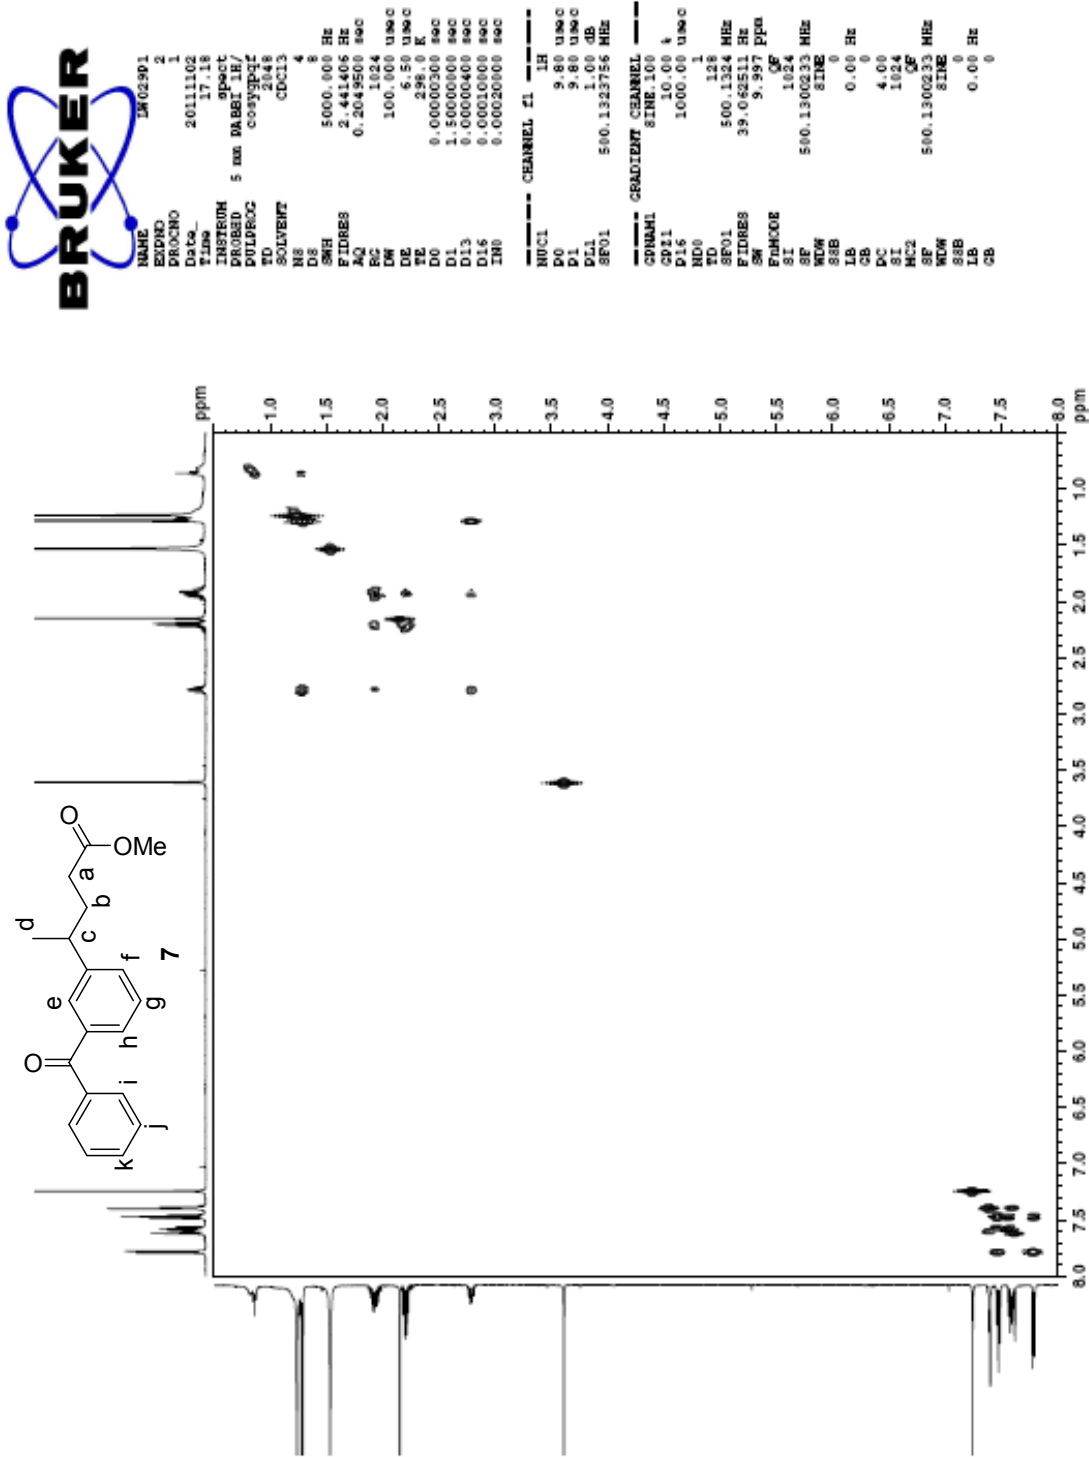



gHSQC spectrum of 7 in CDCl<sub>3</sub>:

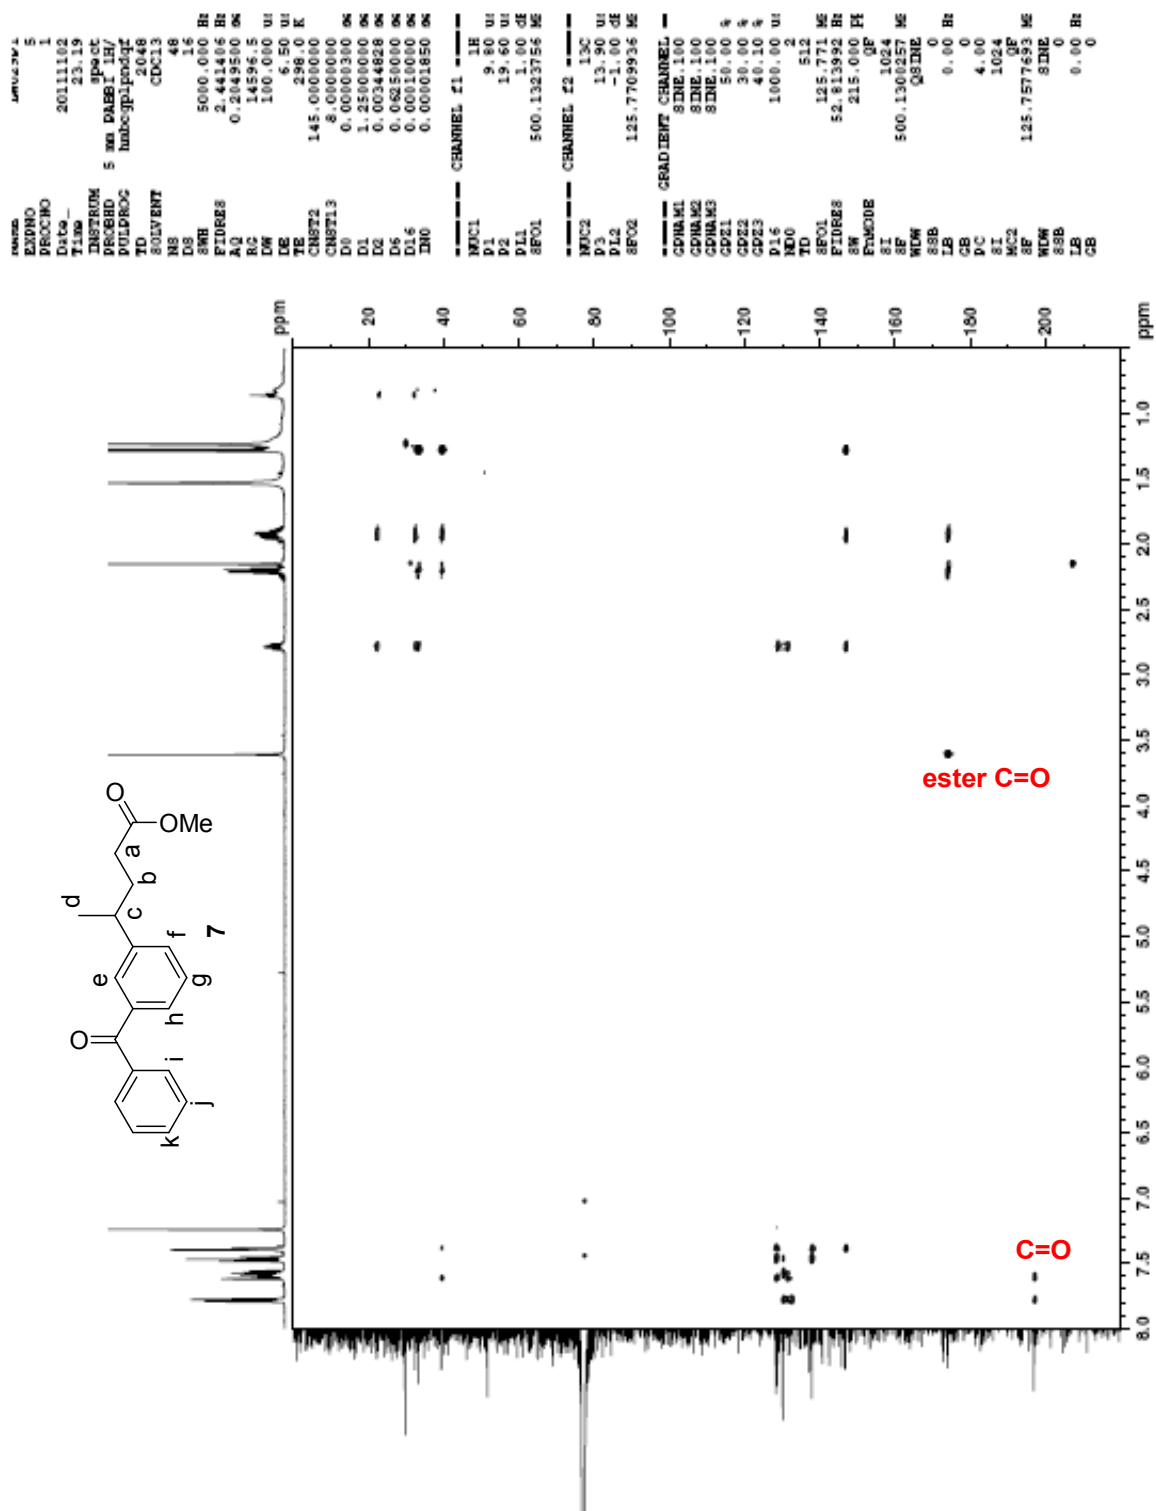

<sup>13</sup>C-NMR (125 MHz, CDCl<sub>3</sub>) spectrum of 7:

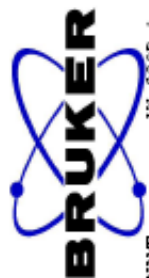

```

NAME LW-029F-1
EXPNO 4
PROCNO 1
Date_ 20131105
Time_ 10.24
INSTRUM spect
PROBHD 5 mm PABBO BB-
PULPROG zgpg30
TD 65536
SOLVENT CDCl3
NS 16384
DS 2
SWH 29965.508 Hz
FIDRES 0.44284 Hz
AQ 1.1305633 sec
RG 14596.5
CW 17.250 use
DE 6.50 use
TE 298.2 K
D1 2.50000000 sec
D11 0.03000000 sec
TD0 1
  
```

```

===== CHANNEL f1 =====
NUC1 13C
P1 10.00 use
PL1 3.00 dB
SFO1 125.6068292 MHz

===== CHANNEL f2 =====
CPDPRG2 waltz16
NUC2 1H
PCPD2 90.00 use
PL2 -4.00 dB
PL12 14.24 dB
PL13 26.00 dB
SFO2 500.2724013 MHz
SI 32768
SF 125.7929920 MHz
WDW EM
SSB 0
LB 0.90 Hz
GB 0
PC 1.40
  
```

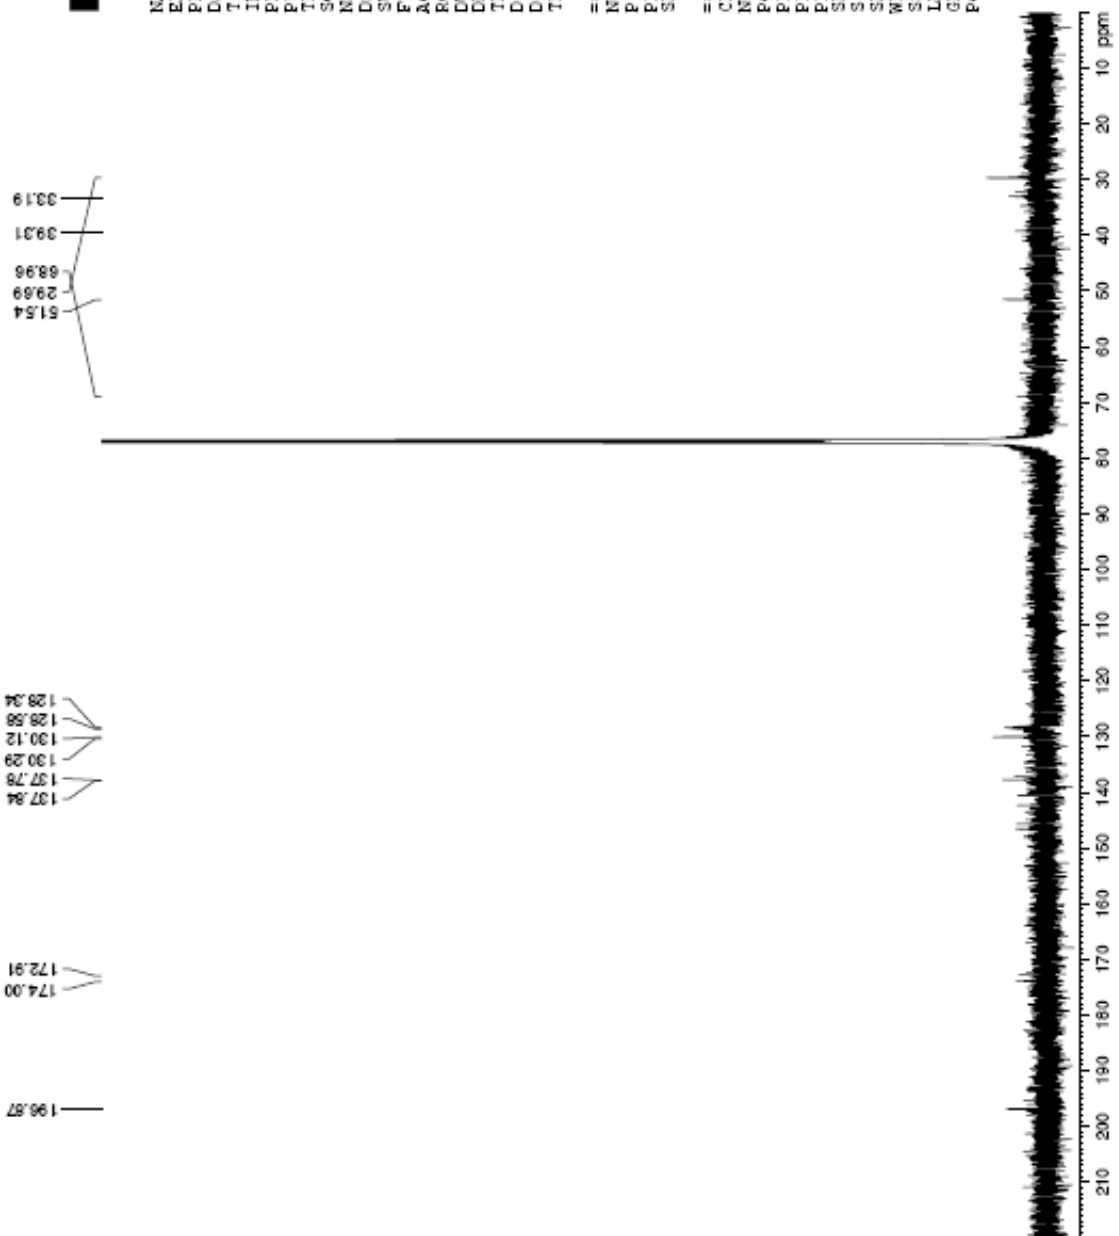

<sup>1</sup>H-NMR (300 MHz, DMSO-d<sub>6</sub>) spectrum of 3 before photolysis:

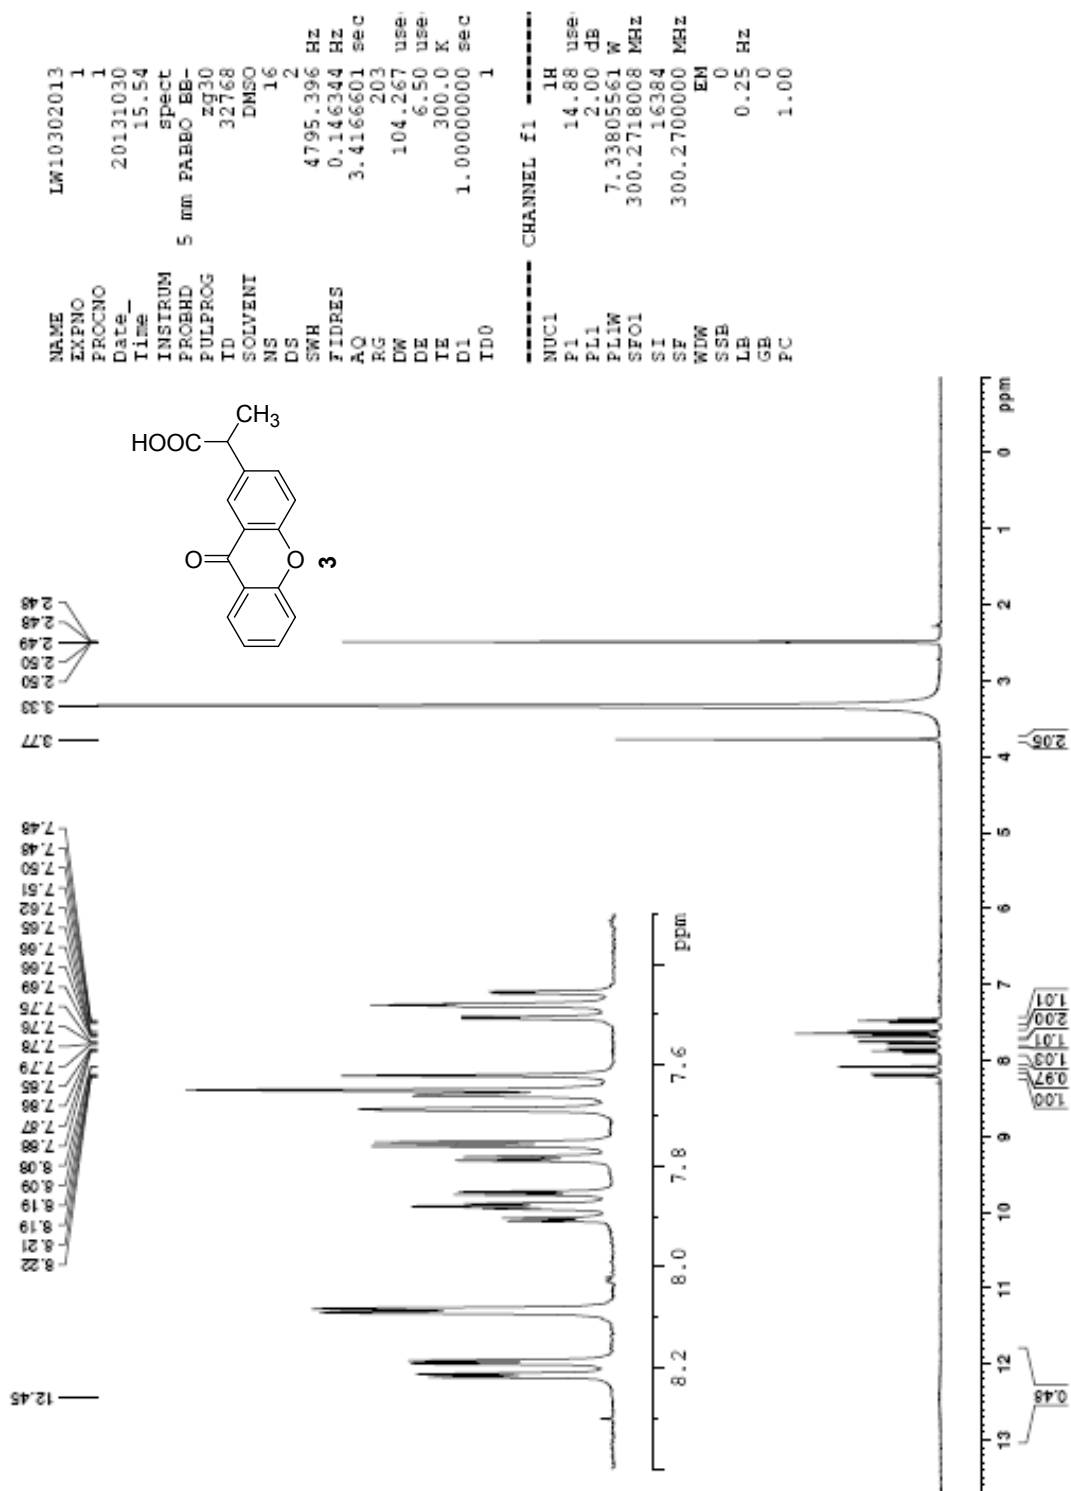



Representative <sup>1</sup>H-NMR spectra of PMA:

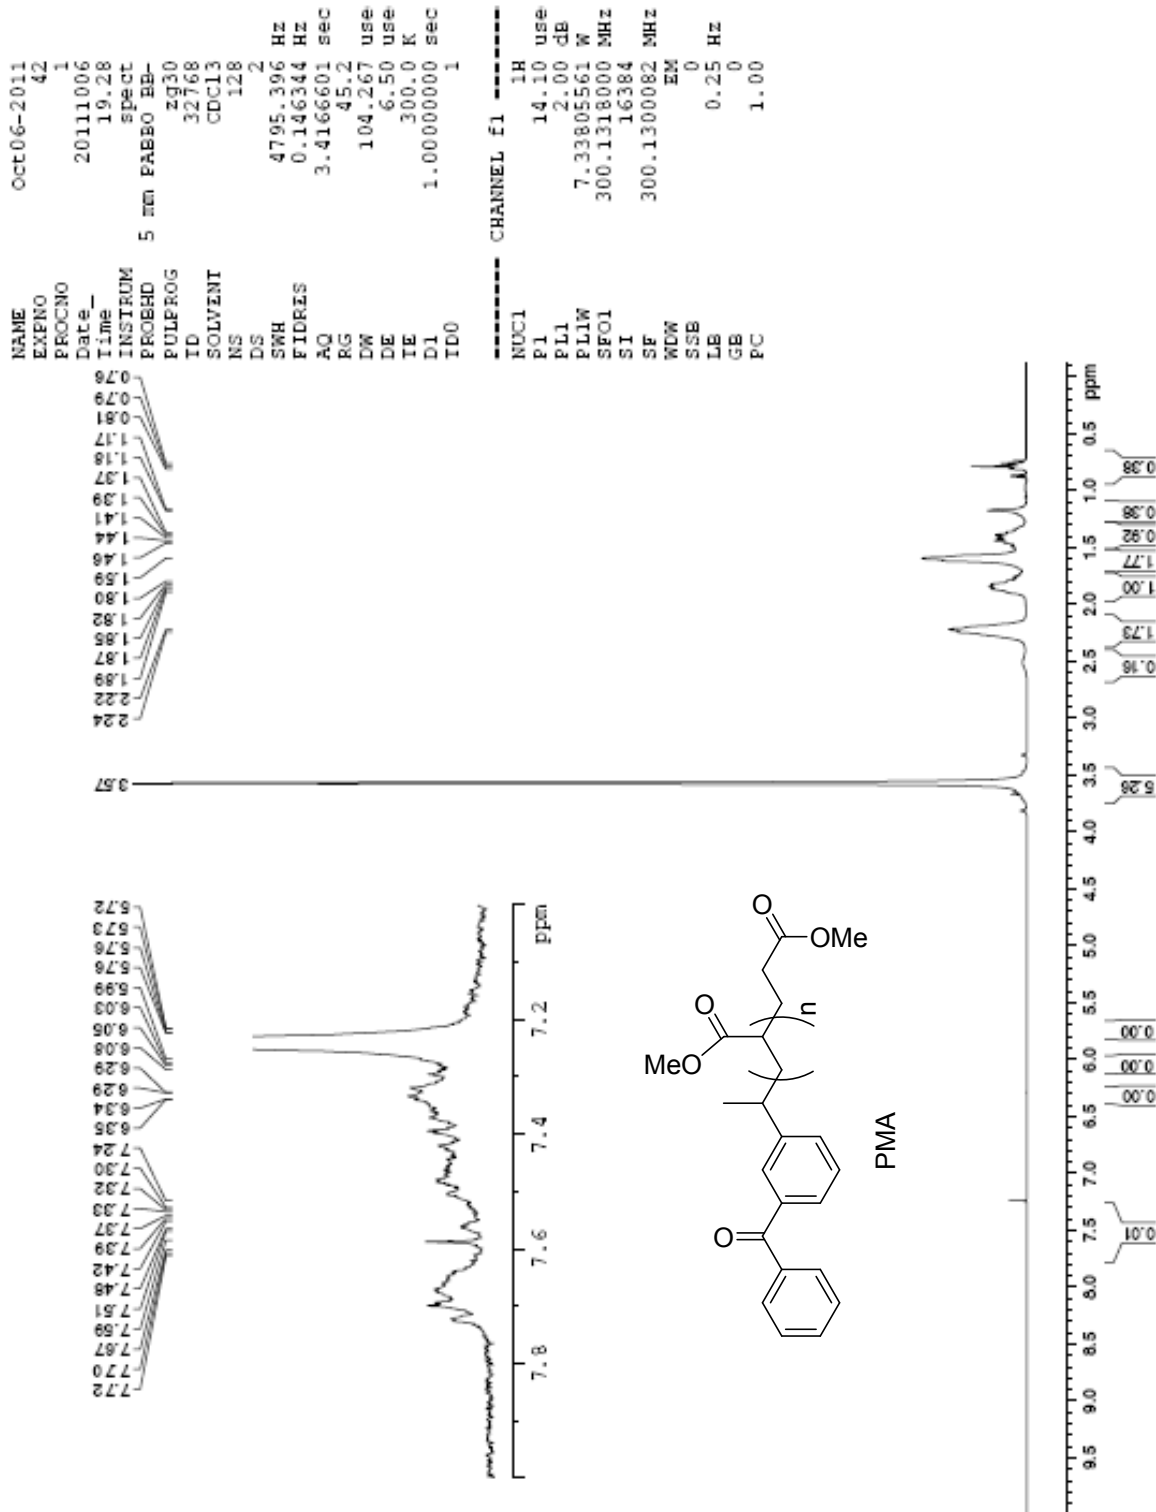

Representative <sup>13</sup>C-NMR spectra of PMA:

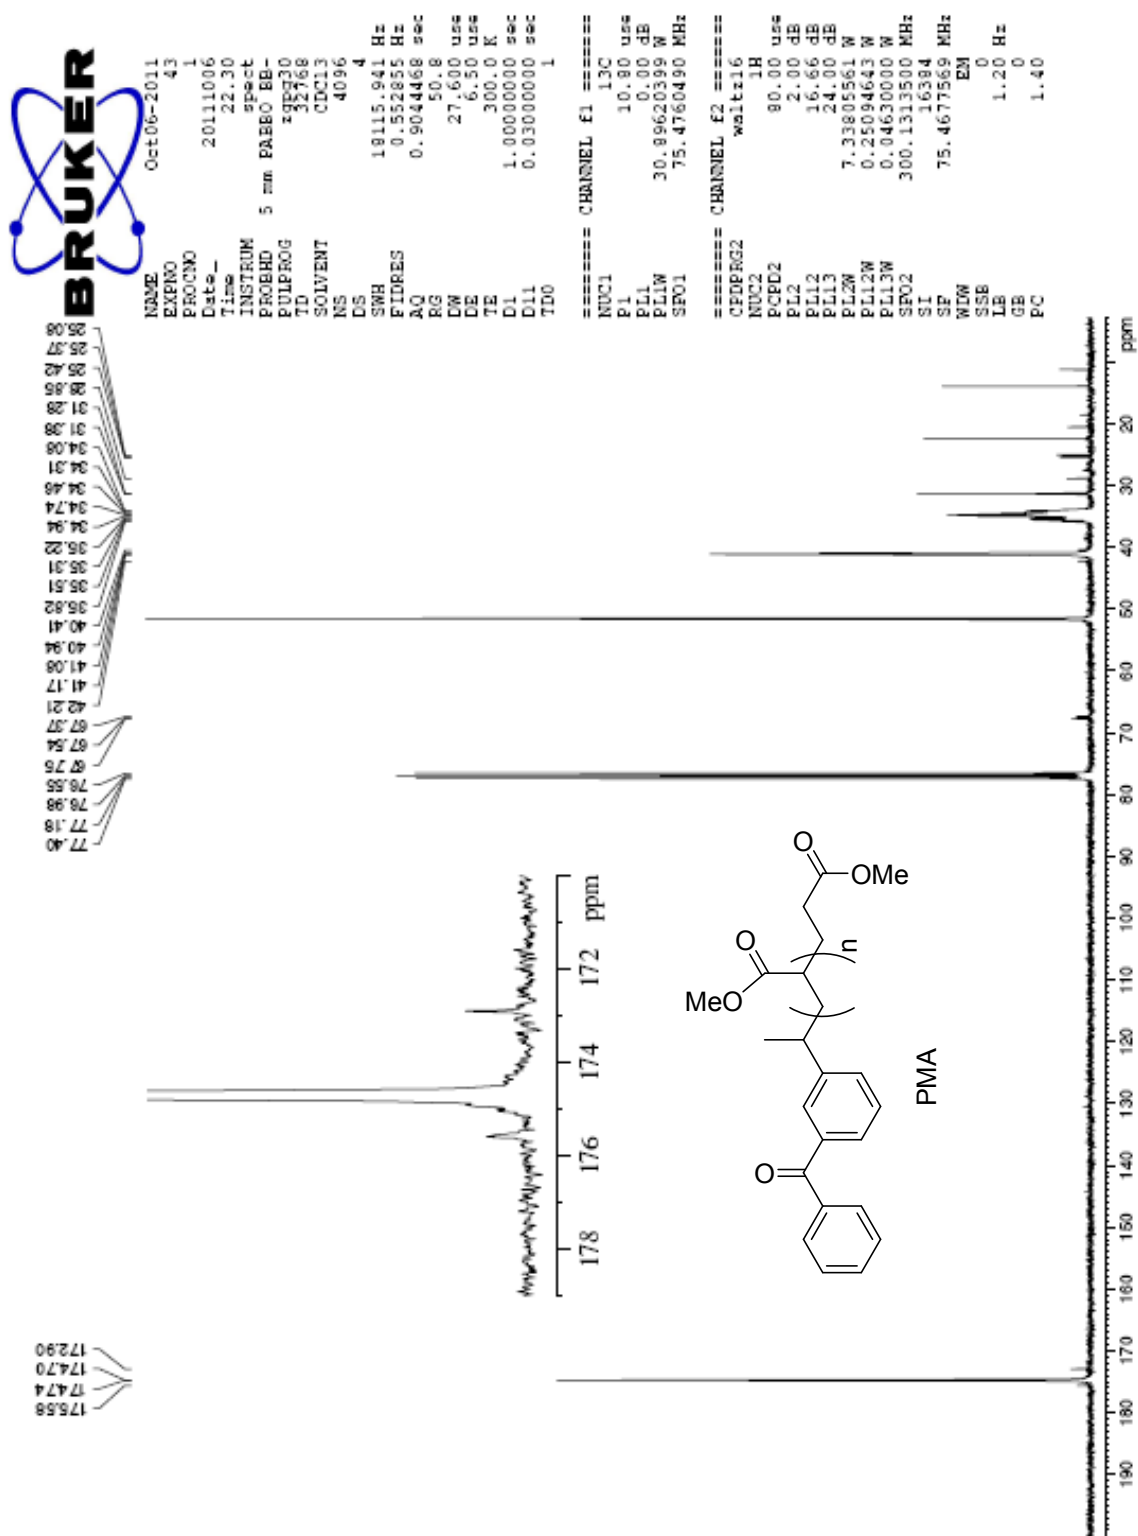

**<sup>1</sup>H-NMR spectra of compound 6:**

```

NAME          Oct20-2011
EXPNO         47
PROCNO        1
Date_         20111020
Time_        18.05
INSTRUM       spect
PROBHD        5 mm PABBO BB-
PULPROG       zg30
ID            32768
SOLVENT       CDCl3
NS            16
DS            2
SWH           4795.396 Hz
FIDRIZ        0.146344 Hz
AQ            3.4166601 sec
RG            203
DW            104.267 use
DE            6.50 use
TE            300.0 K
D1            1.0000000 sec
TD0           1

----- CHANNEL f1 -----
NUC1          1H
P1            14.10 use
PL1           2.00 dB
PL1W          7.33805561 W
SF01          300.1318000 MHz
SI            16384
SF            300.1300258 MHz
WDW           EM
SSB           0
LB            0.25 Hz
GB            0
PC            1.00
  
```

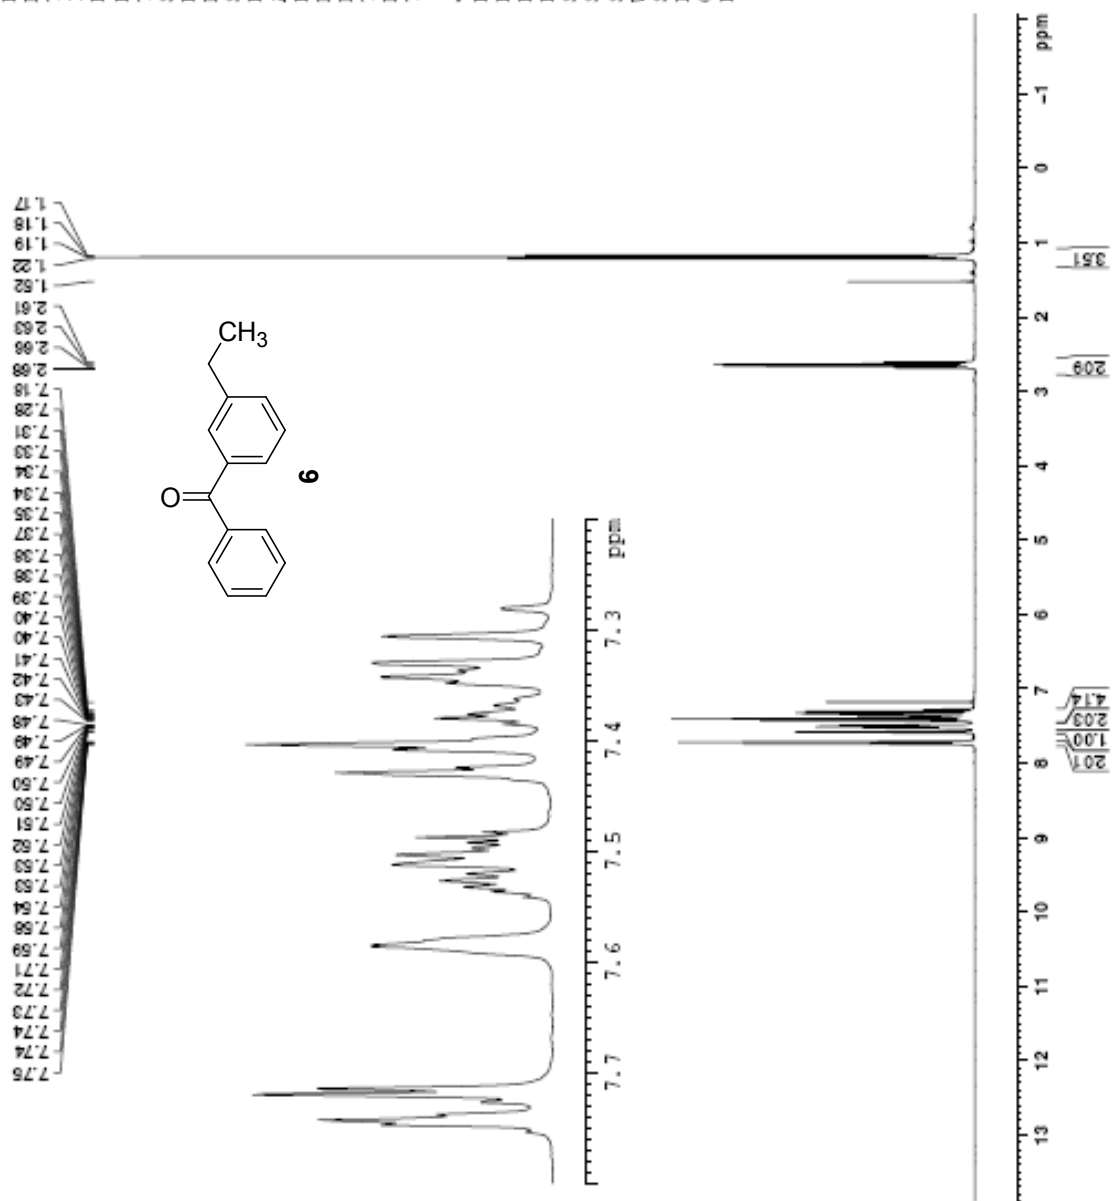

**<sup>1</sup>H-NMR after photolysis of KP and MA (0.25% v/v NaOH/CH<sub>3</sub>CN, 5 min):**

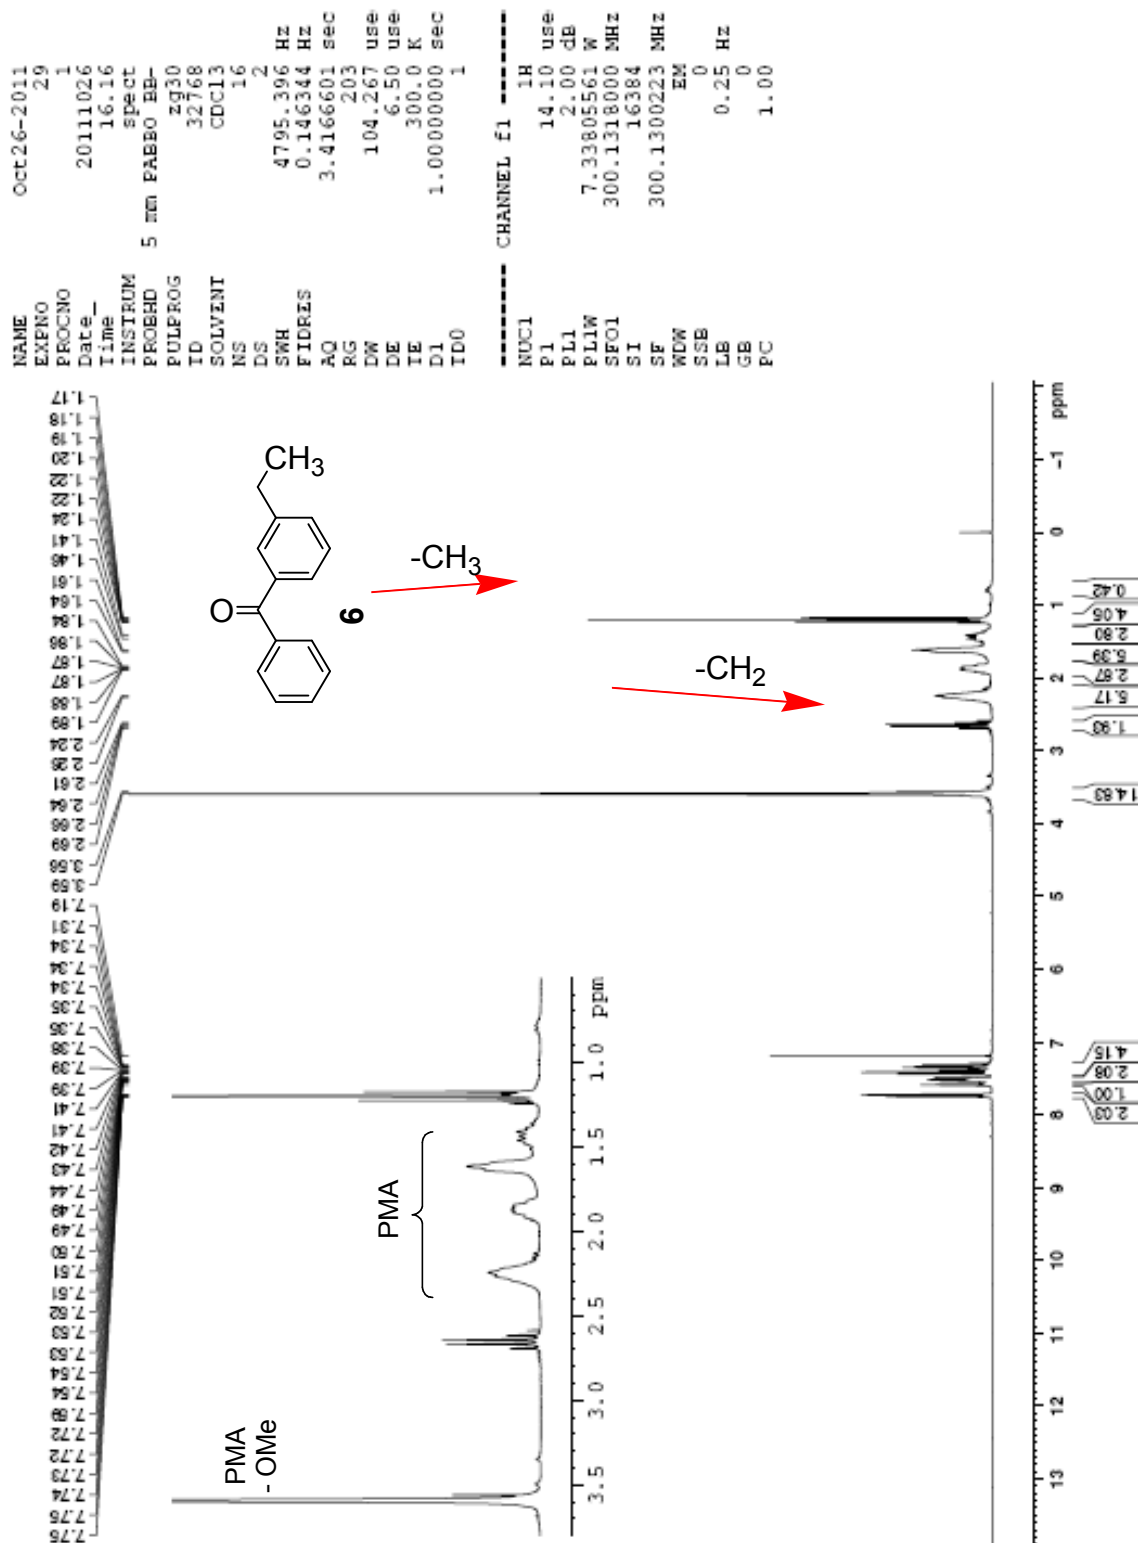

<sup>1</sup>H-NMR after photolysis of 3 without addition of MA (0.25% v/v NaOH/CH<sub>3</sub>CN, 5 min):

```

NAME          LW03142012
EXPNO         3
PROCNO        1
Date_         20120314
Time_         16.25
INSTRUM       spect
PROBHD        5 mm PABBO BB-
PULPROG       zg30
TD            32768
SOLVENT       CDCl3
NS            16
DS            2
SWH           4795.396 Hz
FIDRES        0.146344 Hz
AQ            3.4166601 sec
RG            203
DW            104.267 use
DE            6.50 use
TE            300.0 K
D1            1.00000000 sec
ID0           1

----- CHANNEL f1 -----
NUC1          1H
P1            14.10 use
PL1           2.00 dB
PL1W          7.33805561 W
SFO1          300.1318000 MHz
SI            16384
SF            300.1300082 MHz
WDW           EM
SSB           0
LB            0.25 Hz
GB            0
PC            1.00
  
```

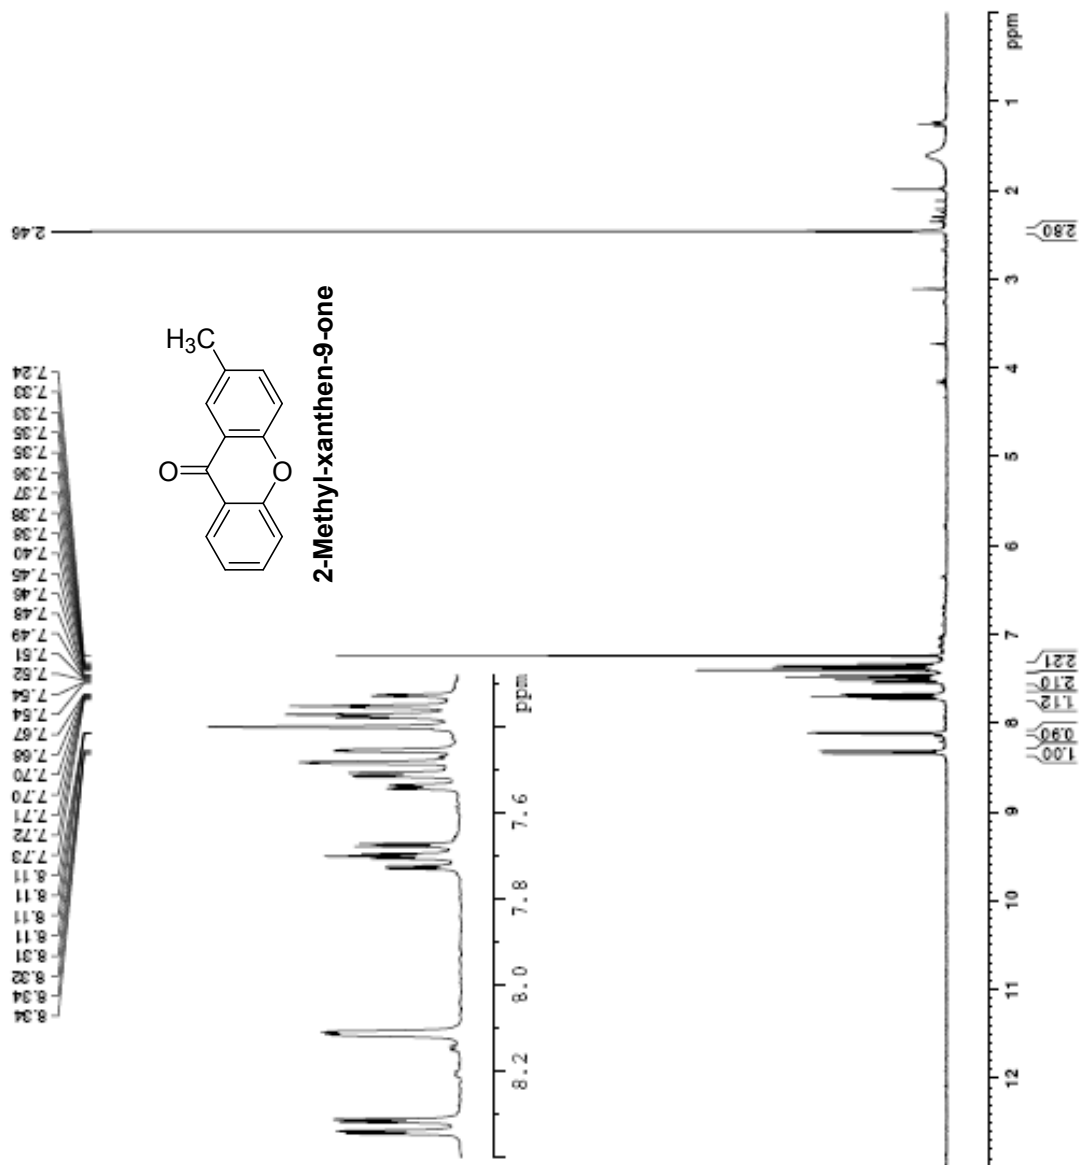

<sup>1</sup>H-NMR after photolysis of 3 and MA (0.25% v/v NaOH/CH<sub>3</sub>CN, 5 min):

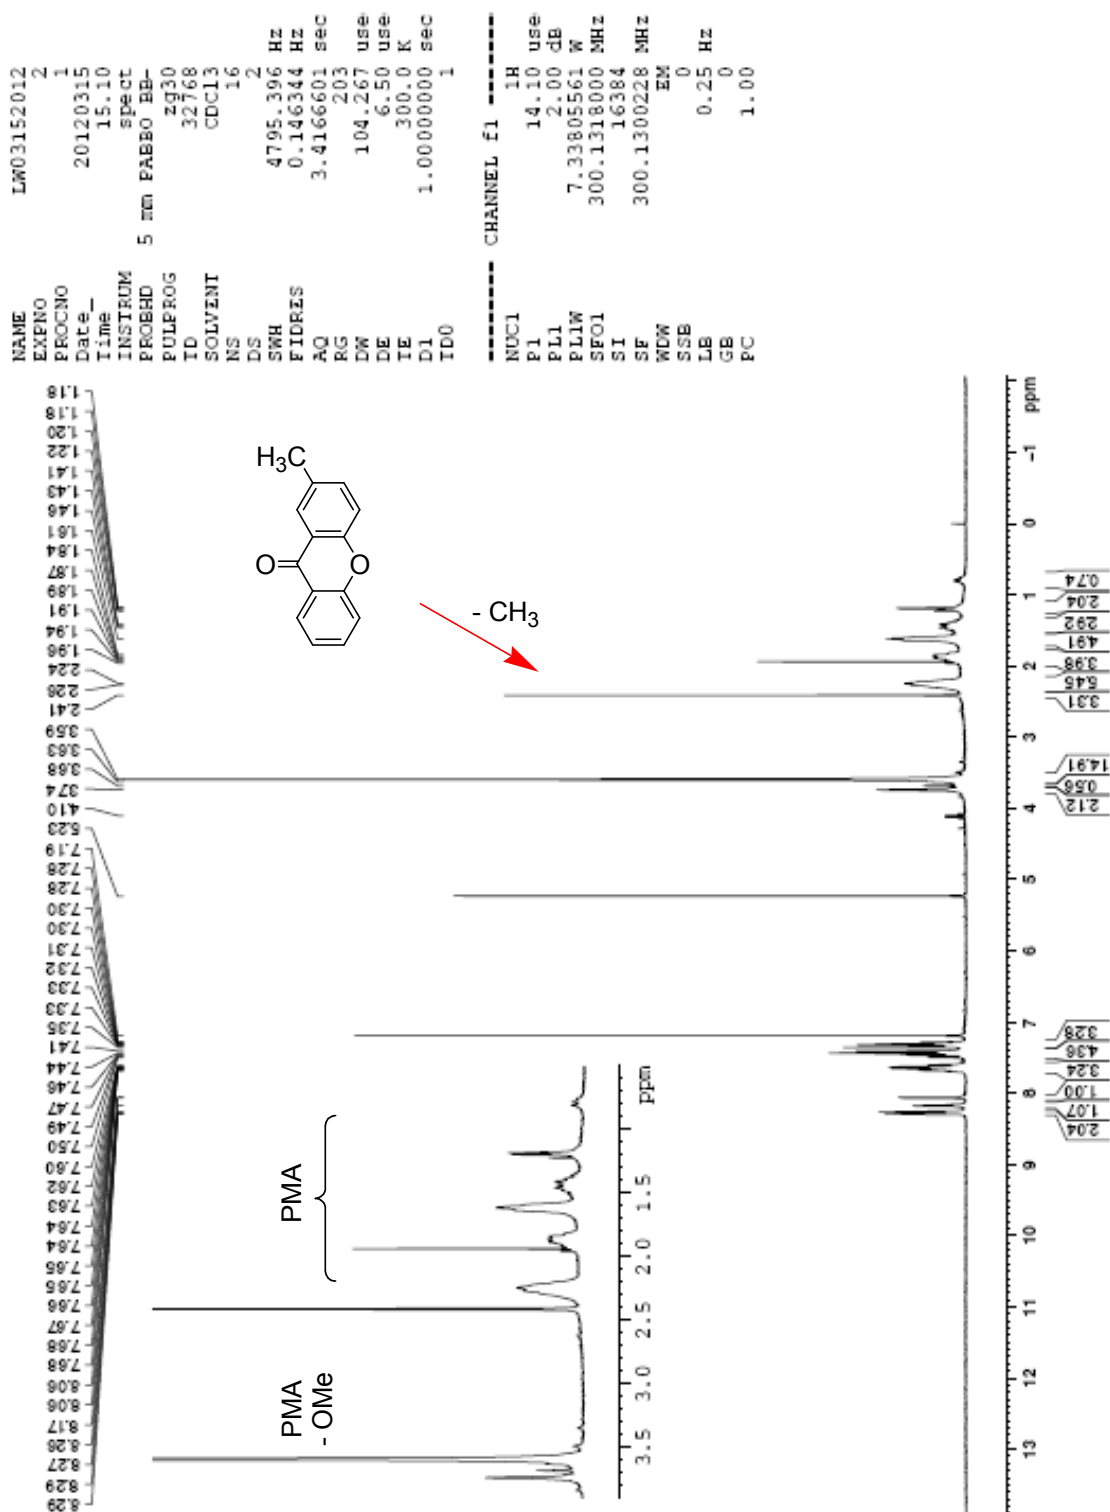

<sup>1</sup>H-NMR after photolysis of 4 without addition of MA (0.25% v/v NaOH/CH<sub>3</sub>CN, 5 min):

```

NAME          Dec22-2011
EXPNO         16
PROCNO        1
Date_         20111222
Time_        17.21
INSTRUM       spect
PROBHD        5 mm PABBO BB-
PULPROG       zg30
ID            32768
SOLVENT       CDCl3
NS            16
DS            2
SWH           4795.396 Hz
FIDRES        0.146344 Hz
AQ            3.4166601 sec
RG            203
DW            104.267 use
DE            6.50 use
TE            300.0 K
D1            1.00000000 sec
ID0           1

----- CHANNEL f1 -----
NUC1          1H
P1            14.10 use
PL1           2.00 dB
PL1W          7.33805561 W
SFO1          300.1318000 MHz
SI            16384
SF            300.1300253 MHz
WDW           EM
SSB           0
LB            0.25 Hz
GB            0
PC            1.00
  
```

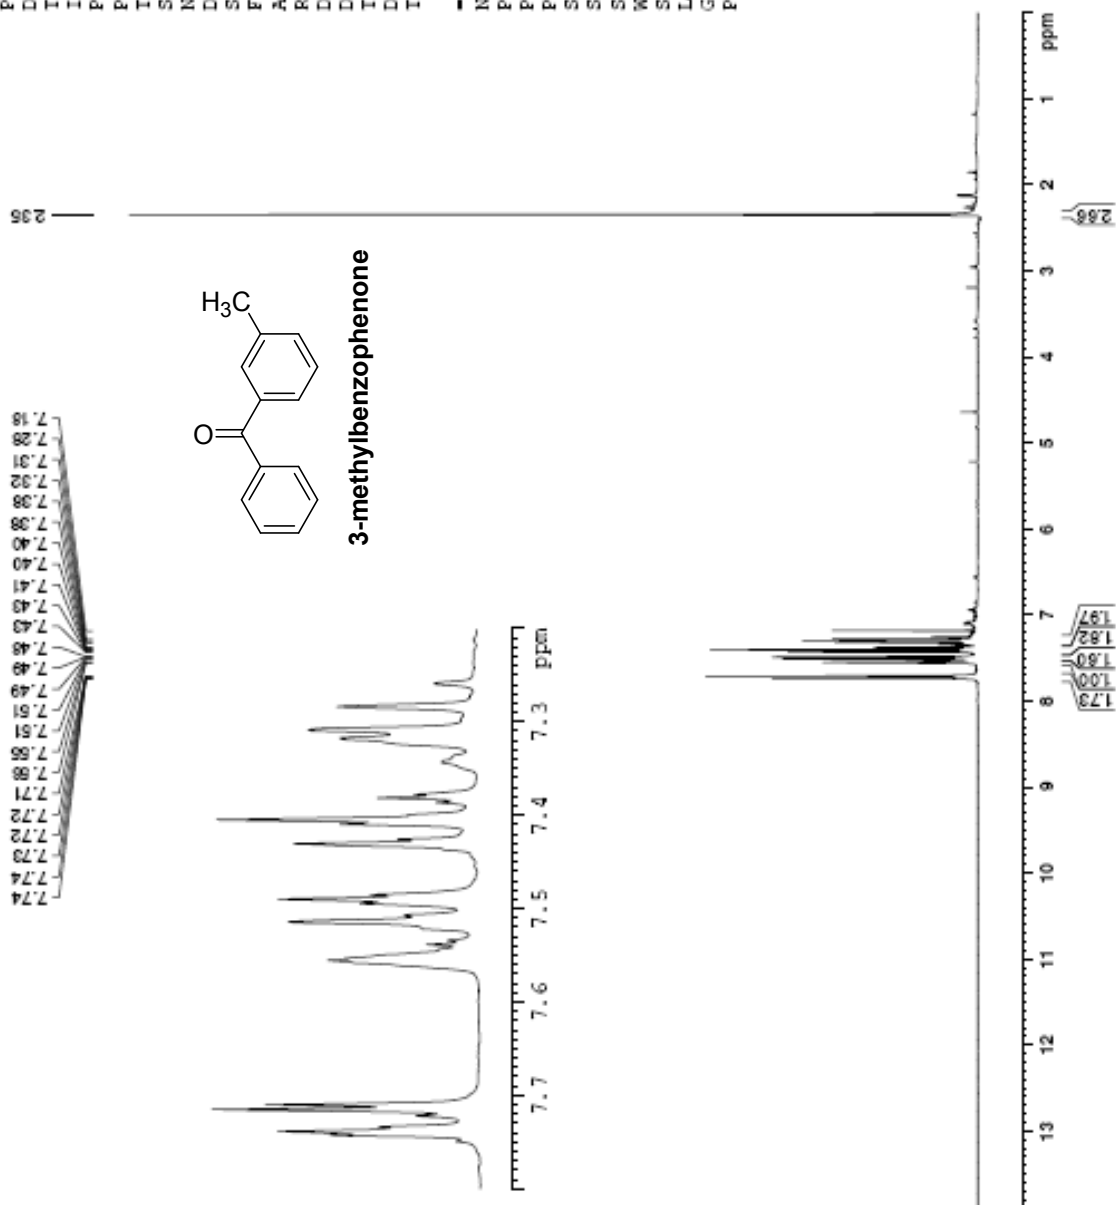

**<sup>1</sup>H-NMR after photolysis of 4 and MA (0.25% v/v NaOH/CH<sub>3</sub>CN, 5 min):**

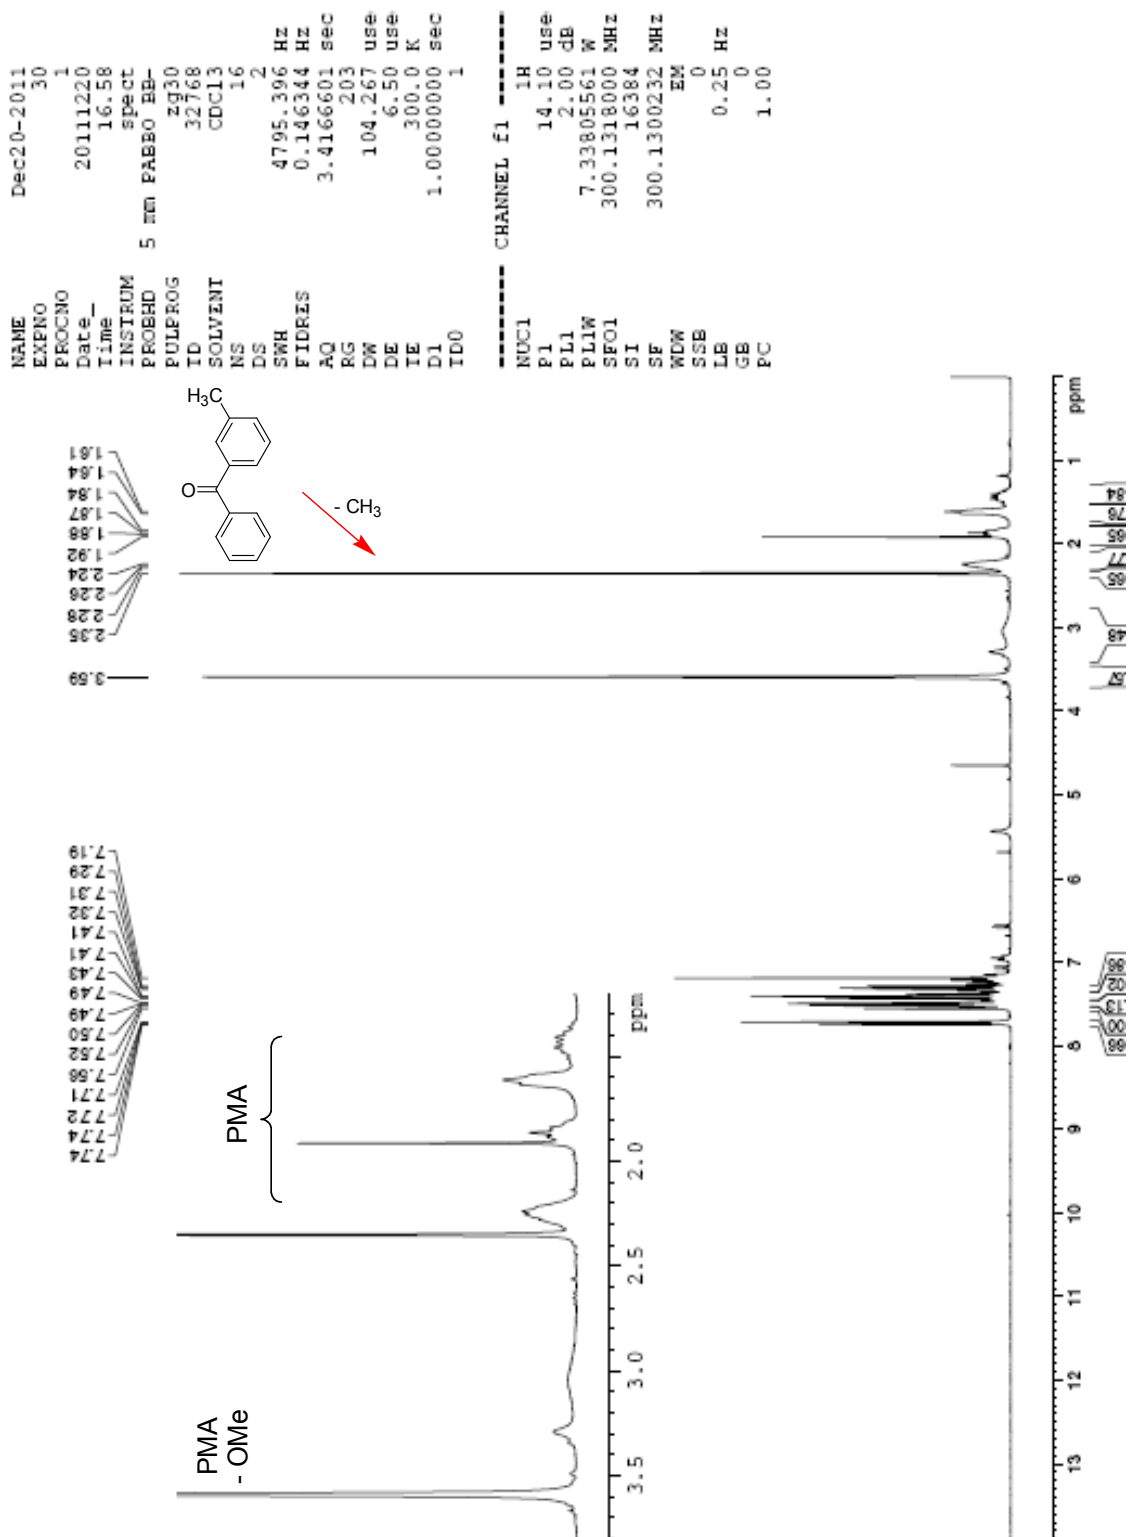



**Gel Permeation Chromatography (GPC) Analyses:** GPC measurements were performed using a Viscotek model 302 liquid chromatography system equipped with refractive index (RI), low-angle light scattering (LALS,  $\theta = 7^\circ$ ), right-angle light scattering (RALS,  $\theta = 90^\circ$ ), and UV detectors. THF was used as the eluent at a flow rate of 1 mL/min, and the column temperature was set at 35 °C. All polymer solutions were filtered through membrane filters with a nominal pore size of 0.45  $\mu\text{m}$  before injection into the GPC column. The data were collected and analyzed on a Dell Dimension 2300 computer with appropriate GPC software from Viscotek. Two ViscoGEL HR high-resolution columns (styrene-divinylbenzene columns) in series were used: G3000 HR 60 k and GMHHR-MMixed Bed 4 M columns. The molecule weight distribution for the PMA polymer was determined from GPC data using an algorithm from Viscotek, which relies on LALS detection from a 670 nm diode laser source.

**Representative gel permeation chromatograms (refractive index detector response) of PMA by different initiators *via* indicated method:**

(a) KP as initiator *via* Method A

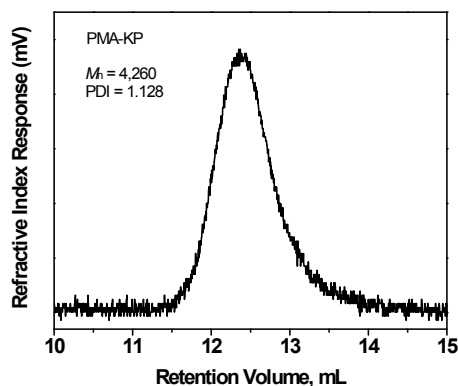

(b) KP carboxylate salt as photoinitiator *via* Method B

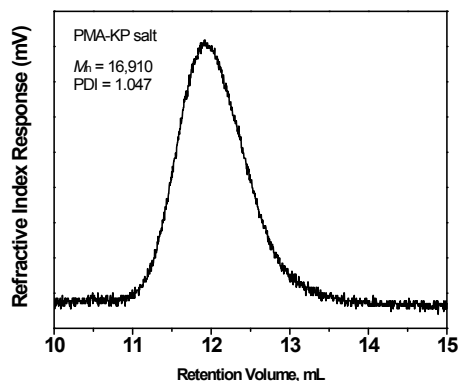

(c) PI 4 as initiator *via* Method A

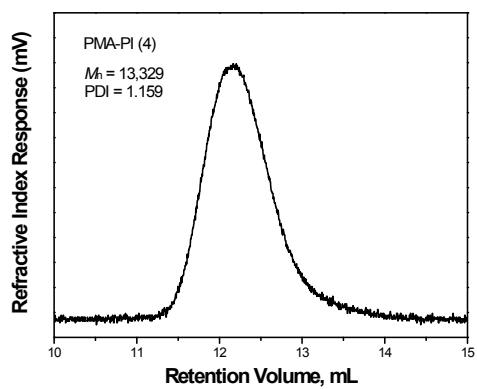

(d) PI 4 carboxylate salt as initiator *via* Method B

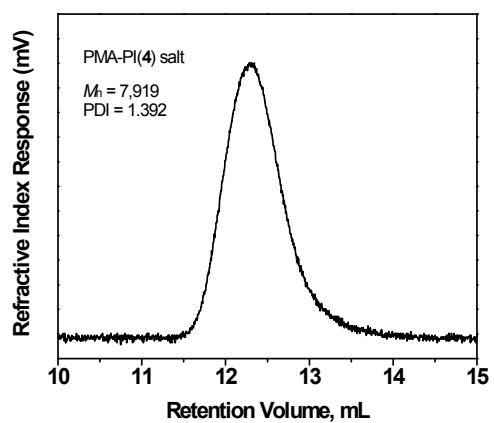

**Transient absorption spectra observed for KP in various solvents:**

**(a) CH<sub>3</sub>CN under N<sub>2</sub>-purged**

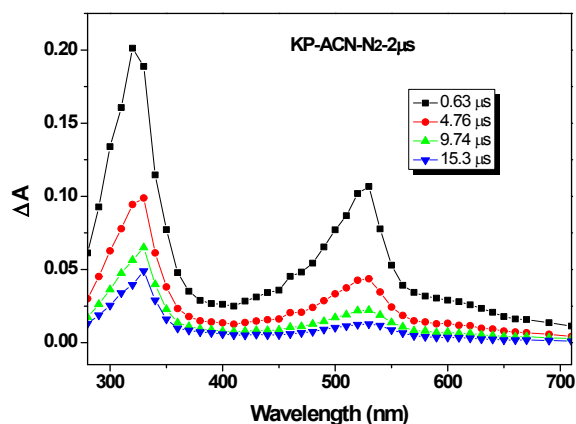

**(b) 0.25 %NaOH<sub>(aq)</sub>/ CH<sub>3</sub>CN, N<sub>2</sub>-purged**

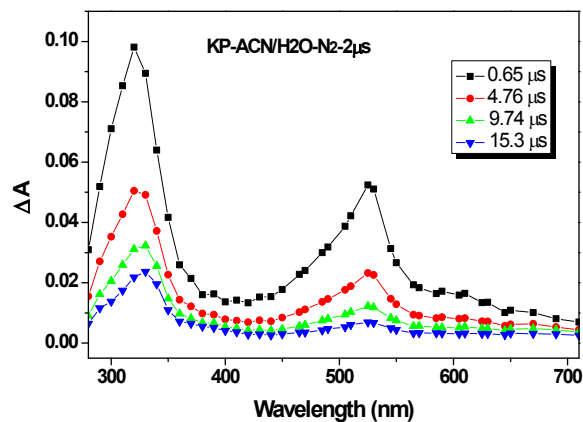

**(c) 0.25%NaOH<sub>(aq)</sub>/ CH<sub>3</sub>CN, N<sub>2</sub>-purged**

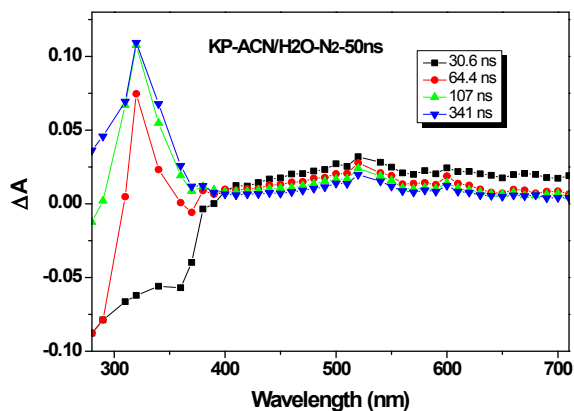

**(d) CH<sub>3</sub>CN vs. 0.25%NaOH<sub>(aq)</sub>/ CH<sub>3</sub>CN**

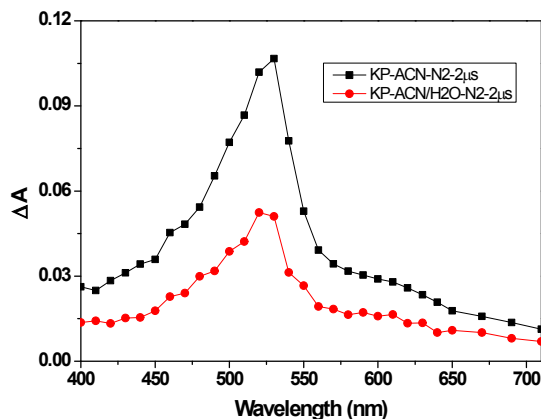

**(f) without vs. with MA**

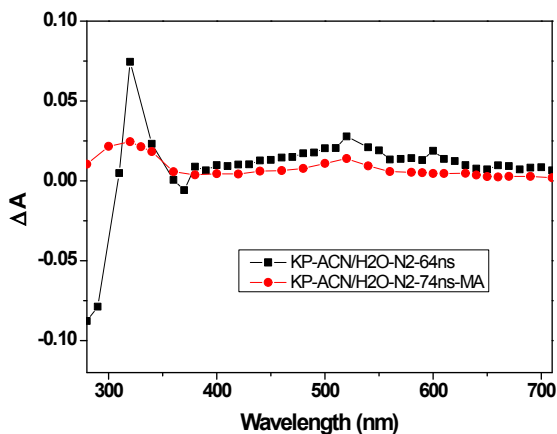

**(g) addition of MA to NaOH<sub>(aq)</sub>/CH<sub>3</sub>CN**

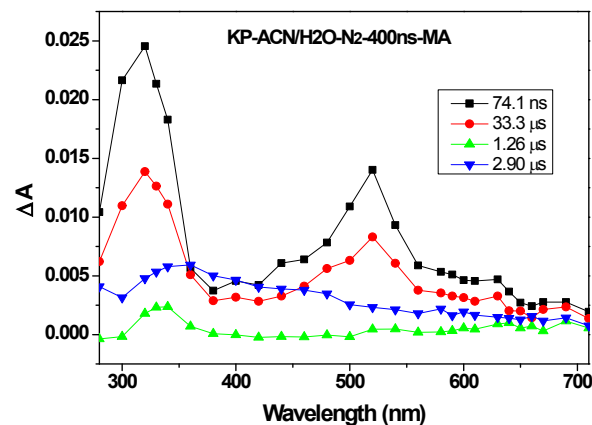

## Quenching Experiments:

A. Decay of the signal at 600 nm, without quencher and after adding methyl acrylate (MA) to Ketoprofen in 0.25% v/v NaOH<sub>(aq)</sub>/CH<sub>3</sub>CN. Without the quencher, the lifetime of KP carbon anion in 0.25% v/v NaOH<sub>(aq)</sub>/CH<sub>3</sub>CN is 622 ns;  $k_q = 1.20 \times 10^{10} \text{ l mol}^{-1} \text{ s}^{-1}$

(a) after delay time of 400 ns

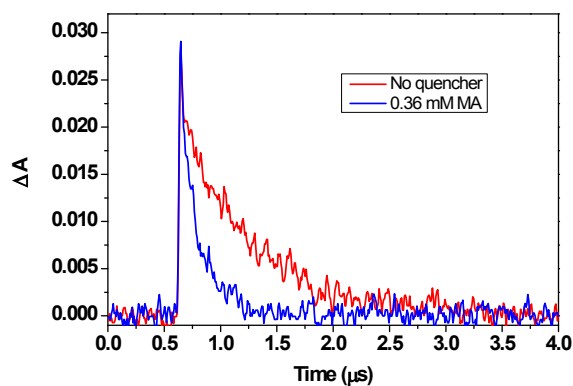

(b) after delay time of 200 ns

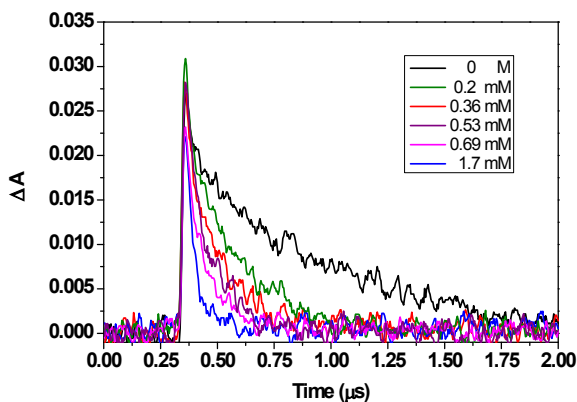

(b) Stern-Volmer plot: quenching rate constant of each decay as a function of quencher (methyl acrylate) concentration [Q]:

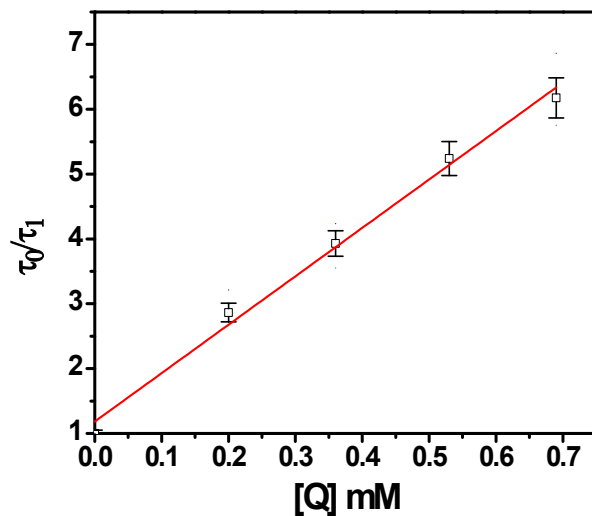

**B.** Decay of the signal at 600 nm, without quencher and after adding methyl methacrylate (MMA) to Ketoprofen in 0.25% v/v NaOH<sub>(aq)</sub>/CH<sub>3</sub>CN. Without the quencher, the lifetime of KP carbon anion in 0.25% v/v NaOH(aq)/ACN is 579 ns;  $k_q = 1.24 \times 10^{11} \text{ l mol}^{-1} \text{ s}^{-1}$

**(a) after delay time of 400 ns**

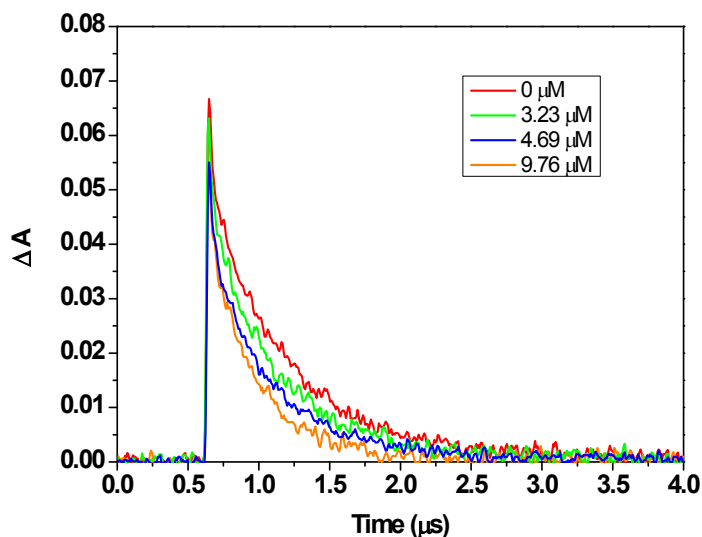

**(b) Stern-Volmer plot: quenching rate constant of each decay as a function of quencher methyl methacrylate (MMA) concentration [Q].**

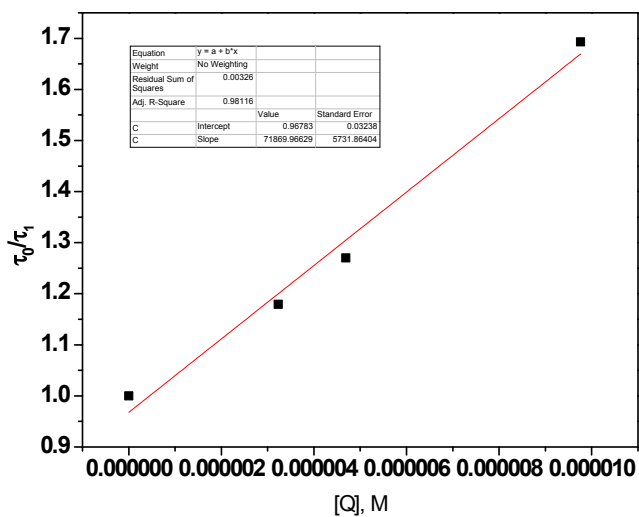

Supplement: c4pp00454j1.pdf [file c4pp00454j1.pdf]
